# Supplementary material for: A feasibility cluster randomised controlled trial of a preschool obesity prevention intervention: ToyBox-Scotland
Source: PubMed Central journal article supplement (PMC6842492; doi:10.1186/s40814-019-0521-7), 2019-11-09
Supplement: 40814_2019_521_MOESM1_ESM.pdf [file 40814_2019_521_MOESM1_ESM.pdf]

## The ToyBox preschool health programme- parent/guardian feedback form

| The questions below ask about the materials that accompanied the ToyBox programme. Please tick <b>one</b> box for each question | Yes | No | Not sure |
|---------------------------------------------------------------------------------------------------------------------------------|-----|----|----------|
| Did you receive the ToyBox-Scotland sticker wallchart from your child's preschool?                                              |     |    |          |
| If so, did you use the wallchart?                                                                                               |     |    |          |
| Did you receive the home activity pack called "fun in the forest"?                                                              |     |    |          |
| Did you receive the home activity pack called "leaping at the loch"?                                                            |     |    |          |
| Did you receive the home activity pack called "fun on the farm"?                                                                |     |    |          |
| Did you receive the home activity pack called "adventures at loch ness"?                                                        |     |    |          |
| Did you receive the home activity pack called "moving in the mountains"?                                                        |     |    |          |
| Did you receive the home activity pack called "flying with the eagles"?                                                         |     |    |          |
| Did you receive the home activity pack called "Fox's games"?                                                                    |     |    |          |

| The next two questions are about your use of the ToyBox home materials. Please tick <b>one</b> box for each question | None | Some | Not sure | Most | All |
|----------------------------------------------------------------------------------------------------------------------|------|------|----------|------|-----|
| How many of the ToyBox home activities that you received did you use at home with your child?                        |      |      |          |      |     |
| Did you award the provided stickers to your child after they completed an activity?                                  |      |      |          |      |     |

| The next questions are about your feelings towards the ToyBox home materials. Please tick <b>one</b> box for each question | Strongly disagree | disagree | Not sure | agree | Strongly agree |
|----------------------------------------------------------------------------------------------------------------------------|-------------------|----------|----------|-------|----------------|
| Overall, did your child enjoy the activities in the programme?                                                             |                   |          |          |       |                |
| Overall, did your child like the stickers and wallchart provided?                                                          |                   |          |          |       |                |
| Did you enjoy doing the activities with your child?                                                                        |                   |          |          |       |                |
| Do you think the activities helped your child be more physically active?                                                   |                   |          |          |       |                |
| Do you think the activities helped your child spend less time sitting/being inactive?                                      |                   |          |          |       |                |
| Do you think the activities helped your child to eat healthier snacks?                                                     |                   |          |          |       |                |
| Do you think the activities helped your child drink more water instead of sugary juices?                                   |                   |          |          |       |                |
| Were the instructions provided for the games/activities easy to read and clear?                                            |                   |          |          |       |                |

Please provide any additional comments that you would like to make about the ToyBox home materials and activities in the box below:

**Thank you for taking the time to complete this feedback form!**
